# Supplementary material
Source: PubMed Central journal article supplement (PMC3951291)
Supplement: NIHMS555266-supplement-Supplemental_Data.pdf [file NIHMS555266-supplement-Supplemental_Data.pdf]

### IRMPD of [M-8H+10Na]<sup>2+</sup>

| m/z      | S/N    |
|----------|--------|
| 306.852  | 167.8  |
| 426.802  | 22.5   |
| 448.784  | 226.7  |
| 449.783  | 12.1   |
| 450.780  | 49.3   |
| 534.823  | 16.8   |
| 546.751  | 14.2   |
| 568.734  | 96     |
| 590.716  | 257.8  |
| 601.802  | 6303.7 |
| 638.334  | 16.8   |
| 654.773  | 23.3   |
| 676.755  | 97.6   |
| 680.855  | 12.5   |
| 686.876  | 59.3   |
| 688.683  | 49.6   |
| 690.678  | 31.8   |
| 694.765  | 17.3   |
| 694.863  | 81     |
| 707.881  | 17.6   |
| 716.747  | 17.8   |
| 719.888  | 10.4   |
| 774.722  | 37     |
| 776.717  | 29.5   |
| 778.915  | 104.5  |
| 779.917  | 50.1   |
| 785.933  | 17.9   |
| 792.733  | 11.8   |
| 796.704  | 116.4  |
| 796.943  | 18.8   |
| 814.714  | 64.5   |
| 894.671  | 16.7   |
| 896.667  | 25     |
| 924.732  | 11.1   |
| 940.749  | 10.8   |
| 1020.701 | 15.5   |
| 1022.698 | 17.2   |
| 1100.659 | 72.9   |
| 1102.655 | 156.4  |
| 1106.641 | 12.5   |
| 1180.615 | 3115.9 |

### ECD of of $[M-8H+10Na]^{2+}$

| m/z       | S/N    |
|-----------|--------|
| 601.803   | 41833  |
| 688.682   | 30.6   |
| 693.661   | 55.4   |
| 704.645   | 17.7   |
| 710.665   | 701.5  |
| 752.676   | 12.6   |
| 768.669   | 27.7   |
| 777.688   | 10.7   |
| 778.689   | 11.4   |
| 780.715   | 12     |
| 790.620   | 225.1  |
| 791.629   | 103.3  |
| 796.703   | 70.5   |
| 802.689   | 28.8   |
| 806.683   | 25.6   |
| 808.631   | 155.8  |
| 814.714   | 33.1   |
| 818.684   | 273.7  |
| 834.680   | 20.5   |
| 836.695   | 130.8  |
| 852.689   | 10.3   |
| 869.637   | 28.4   |
| 874.640   | 24.4   |
| 885.631   | 10.8   |
| 894.669   | 60.8   |
| 898.639   | 23     |
| 899.649   | 98.6   |
| 900.656   | 117    |
| 916.651   | 273.6  |
| 922.733   | 22.1   |
| 932.647   | 133.6  |
| 945.653   | 16.7   |
| 968.679   | 27.9   |
| 974.654   | 38.7   |
| 984.683   | 19.6   |
| 996.675   | 10.3   |
| 997.618   | 17.2   |
| 1,002.686 | 13.5   |
| 1,012.668 | 14.7   |
| 1,020.713 | 23.8   |
| 1,038.630 | 14.2   |
| 1,042.678 | 58.4   |
| 1,100.650 | 44.4   |
| 1,122.653 | 18.6   |
| 1,174.573 | 27.5   |
| 1,180.605 | 2090.5 |

### IRMPD of $[M-8H+6Na]^{2-}$

| m/z     | S/N     |
|---------|---------|
| 318.847 | 260.3   |
| 324.930 | 9039.9  |
| 412.851 | 182.1   |
| 413.352 | 17.6    |
| 413.849 | 39.3    |
| 418.842 | 20.9    |
| 420.904 | 18.5    |
| 424.927 | 57.9    |
| 426.869 | 89.2    |
| 432.894 | 20.4    |
| 434.910 | 88.2    |
| 438.943 | 48.3    |
| 444.879 | 2067.8  |
| 452.829 | 106.5   |
| 456.955 | 17.5    |
| 460.779 | 93.6    |
| 460.889 | 127.7   |
| 466.862 | 43.4    |
| 470.970 | 22.9    |
| 474.904 | 10.3    |
| 476.920 | 16.4    |
| 478.790 | 40.8    |
| 482.761 | 34.5    |
| 482.934 | 122.1   |
| 484.873 | 16.8    |
| 490.900 | 55.7    |
| 492.916 | 228.4   |
| 493.919 | 26.8    |
| 494.796 | 25.5    |
| 494.932 | 68.2    |
| 500.772 | 237.3   |
| 500.882 | 180.8   |
| 504.855 | 503.3   |
| 514.960 | 35      |
| 515.846 | 205.5   |
| 520.911 | 68      |
| 524.837 | 17      |
| 528.877 | 34.8    |
| 533.268 | 11.5    |
| 538.859 | 33.6    |
| 555.824 | 42199.1 |
| 564.829 | 162.6   |
| 565.832 | 16.8    |
| 566.825 | 25      |
| 568.799 | 15.4    |
| 580.729 | 365.2   |
| 584.722 | 11.8    |

|         |        |
|---------|--------|
| 586.811 | 2562.5 |
| 589.810 | 46     |
| 590.804 | 31.1   |
| 602.711 | 23.1   |
| 603.018 | 16     |
| 604.822 | 119.3  |
| 608.794 | 265    |
| 609.795 | 28.9   |
| 626.804 | 755.8  |
| 661.025 | 36.2   |
| 666.769 | 517    |
| 688.751 | 108.8  |
| 706.761 | 5330.4 |
| 728.744 | 2572.7 |
| 746.755 | 176.2  |
| 786.719 | 209    |
| 808.701 | 1703.2 |
| 826.712 | 275.4  |
| 934.734 | 434.8  |

**EDD of [M-8H+6Na]<sup>2-</sup>**

| m/z     | S/N     |
|---------|---------|
| 460.890 | 41      |
| 462.906 | 17.5    |
| 482.935 | 50.8    |
| 492.917 | 91.8    |
| 493.921 | 11      |
| 500.883 | 63.9    |
| 515.846 | 27.8    |
| 520.912 | 24.4    |
| 538.858 | 13.4    |
| 544.833 | 362.2   |
| 555.823 | 31994.7 |
| 586.810 | 20.8    |
| 598.826 | 13.7    |
| 620.721 | 30.4    |
| 644.382 | 13.6    |
| 644.634 | 11.6    |
| 644.882 | 14.4    |
| 661.027 | 18.1    |
| 661.904 | 17.7    |
| 662.903 | 10.8    |
| 700.677 | 26.7    |
| 706.762 | 17.3    |
| 718.688 | 18.9    |
| 728.743 | 43.6    |
| 744.737 | 12.4    |
| 786.749 | 73.9    |
| 808.699 | 88.8    |
| 809.706 | 62.6    |
| 824.695 | 18.3    |
| 825.703 | 38.3    |
| 826.710 | 61.4    |
| 842.705 | 19      |
| 865.734 | 10.5    |
| 867.707 | 21.9    |
| 877.737 | 10.7    |
| 879.750 | 97.5    |
| 888.657 | 66      |
| 889.663 | 62.3    |
| 892.720 | 50.6    |
| 895.745 | 73.3    |
| 905.729 | 19.8    |
| 906.667 | 24.9    |
| 908.717 | 22      |
| 911.740 | 25.4    |
| 920.718 | 12.8    |
| 921.724 | 23.5    |
| 923.740 | 40.1    |

|          |       |
|----------|-------|
| 928.745  | 71.8  |
| 939.735  | 34.4  |
| 950.727  | 192.4 |
| 951.732  | 89.2  |
| 957.692  | 12.2  |
| 959.707  | 118.7 |
| 967.733  | 14.1  |
| 972.680  | 45.5  |
| 975.701  | 35.5  |
| 989.691  | 10.2  |
| 1001.682 | 67.6  |
| 1030.684 | 58.2  |
| 1031.692 | 333.1 |
| 1053.641 | 11.5  |
